# Supplementary figures and images for: Elucidating Biological Functions of 9-cis-Epoxycarotenoid Dioxygenase Genes Involved in Seed Dormancy in Paeonia lactiflora
Source: MDPI journal article supplement (doi:10.3390/plants12040710), 2023-02-06

The full-length gels and blots of **Figure S1**.

**Figure S1 (a)**

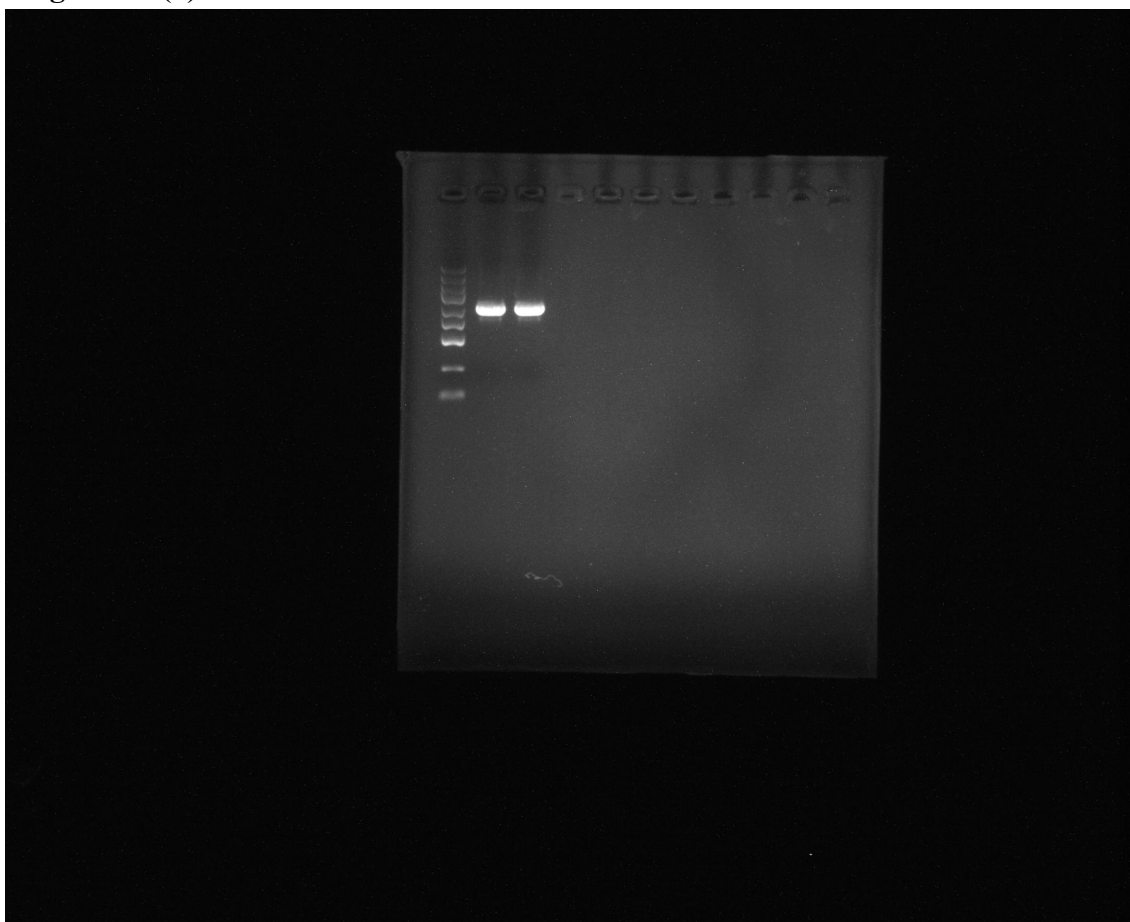

**Figure S1 (b)**

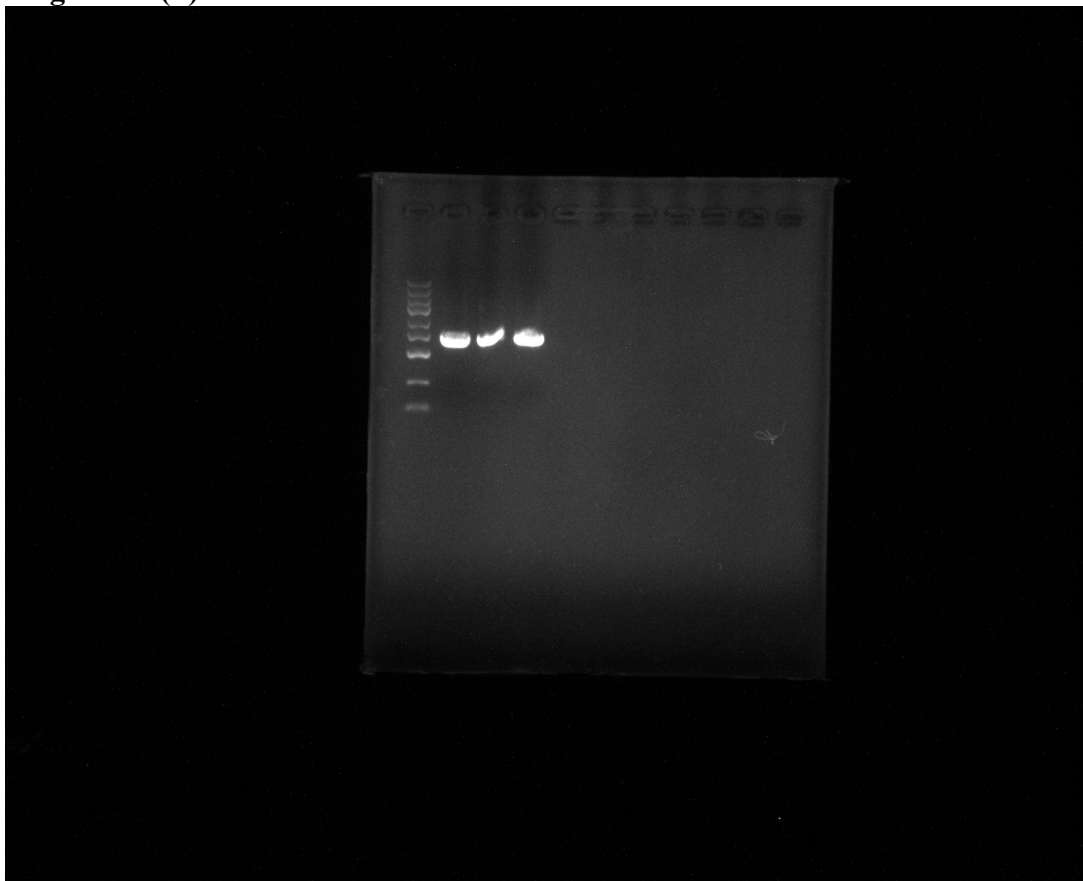

**Figure S1 (c)**

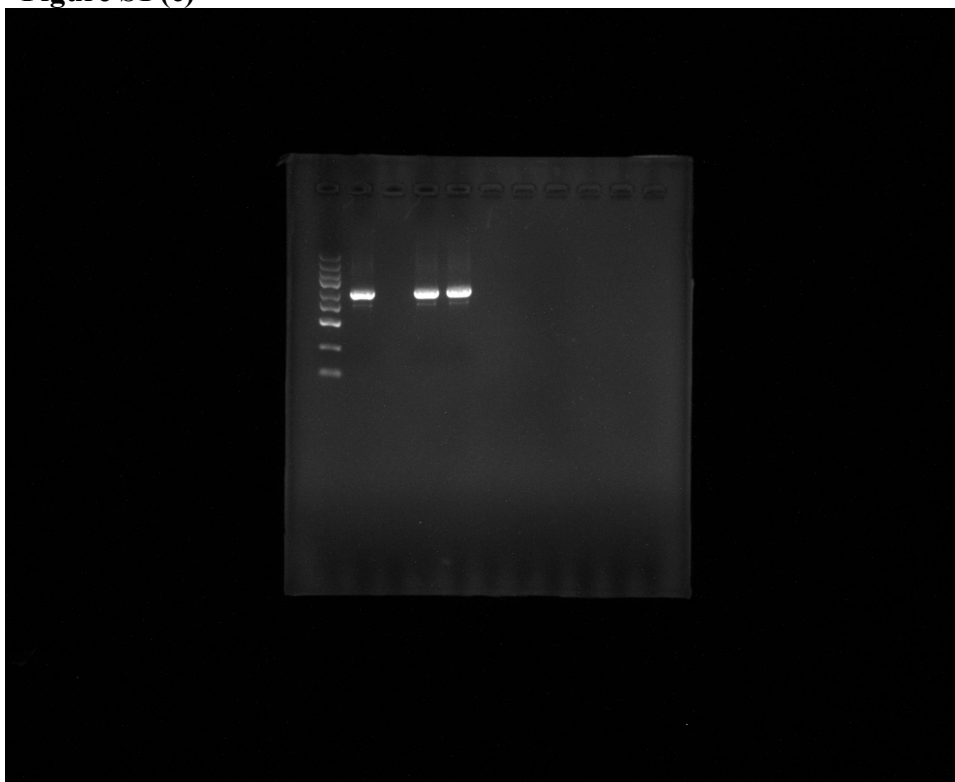

**Figure S1 (d)**

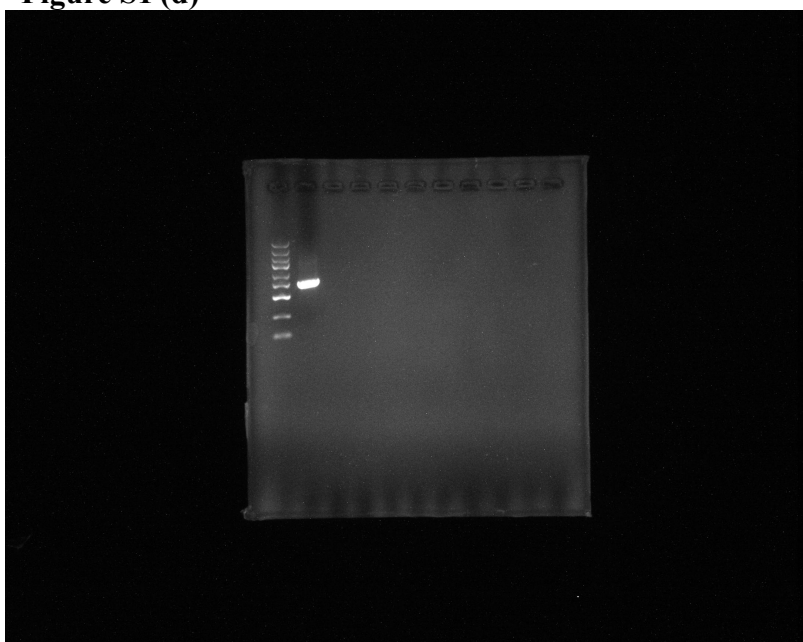

Supplement: s1 [file s1]
